# Supplementary material for: Essential role for epithelial HIF-mediated xenophagy in control of Salmonella infection and dissemination
Source: PubMed Central journal article supplement — Cell Rep. Author manuscript; Available in PMC 2022 Oct 11. (PMC9553003; doi:10.1016/j.celrep.2022.111409), 2022-09-27
Supplement: NIHMS1839180-supplement-1.pdf [file NIHMS1839180-supplement-1.pdf]

Cell Reports, Volume 40

**Supplemental information**

**Essential role for epithelial HIF-mediated  
xenophagy in control of *Salmonella* infection  
and dissemination**

**Alexander S. Dowdell, Ian M. Cartwright, David A. Kitzenberg, Rachael E. Kostecky, Omemh Mahjoob, Bejan J. Saeedi, Nichole Welch, Louise E. Glover, and Sean P. Colgan**

Supplementary Figure 1: Activation of autophagy in the intestinal epithelium by daily administration of rapamycin. Related to Figure 7

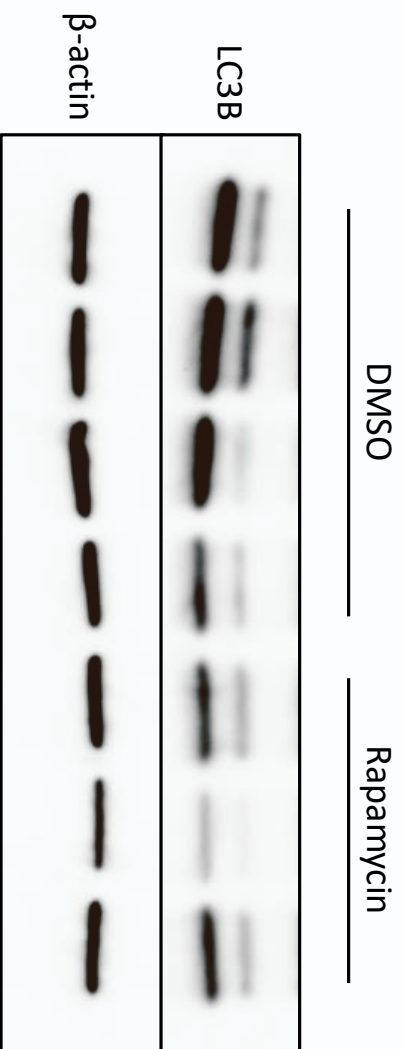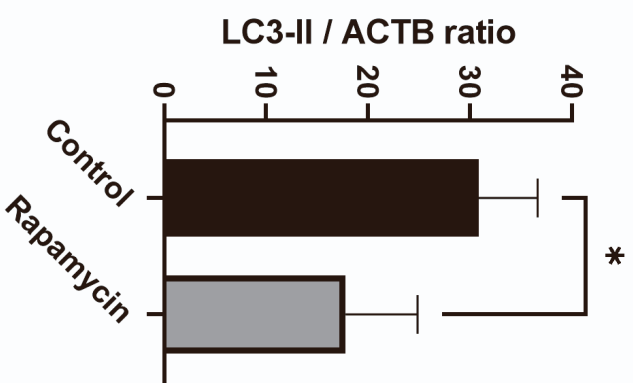

Rapamycin (8 mg/kg) or DMSO vehicle was administered to C57BL/6J wild-type mice daily for four days, at which time mice were sacrificed and IFCs isolated for Western Blot. Each lane represents a separate biological replicate. Densitometry analysis of Western Blot given at right. \*  $p < 0.05$  by t-test.

Supplementary Figure 2: Assessment of intestinal colonization in WT or Hif1b $\Delta$ IEC mice, treated with either DMSO or rapamycin. Related to Figure 7

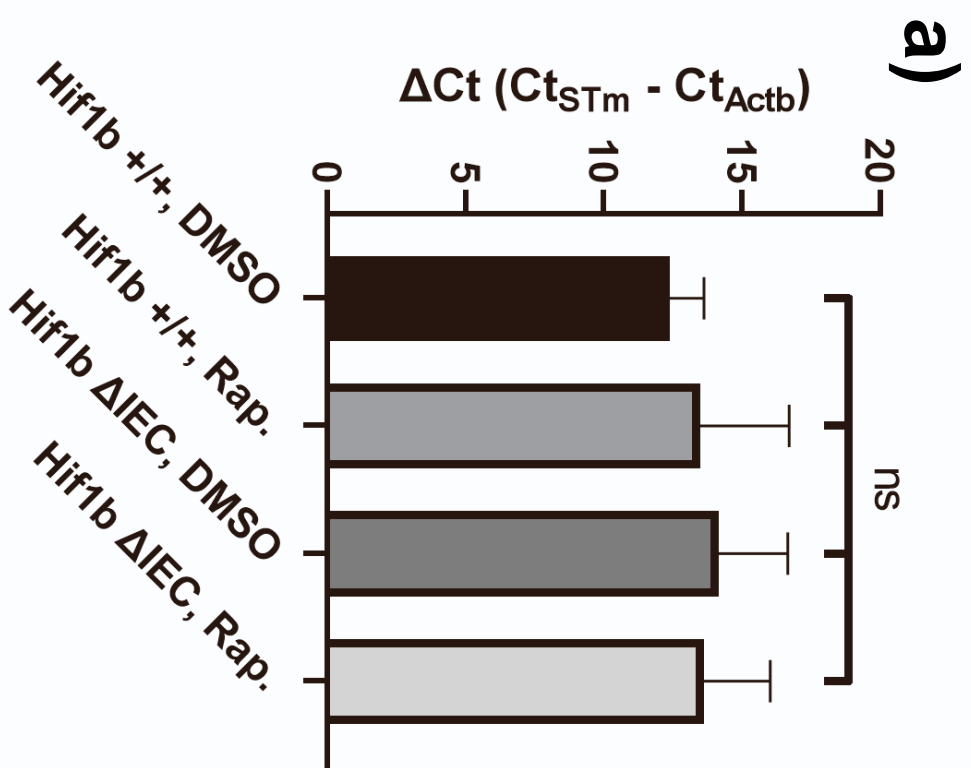

No statistically significant difference in *S. Typhimurium* colonization of terminal ileum is observed between experimental groups as measured by qPCR detecting *S. Typhimurium*-specific 16S rRNA. Statistics by one-way ANOVA after normalization to Actb.

Supplementary Table 1: qPCR Primers Used in this Study. Related to Figures 1, 3, 5, and 6

|                    | Fwd (5' -> 3')          | Rev (5' -> 3')          |
|--------------------|-------------------------|-------------------------|
| <u>Human</u>       |                         |                         |
| <i>apol1</i>       | GAGGTGAGGGAGTTTTTGGGT   | TCGTGTGAGTTGGTAAGTATTGC |
| <i>atg9b</i>       | TGTGCTCACCGTCTACGAC     | GGGAGGTAGTGCATGTGGG     |
| <i>bnip3</i>       | CAGGGCTCCTGGGTAGAACT    | CTACTCCGTCCAGACTCATGC   |
| <i>nod2/card15</i> | TGGTTCAGCCTCTCACGATGA   | CAGGACACTCTCGAAGCCTT    |
| <i>gabarapl1</i>   | ATGAAGTTCCAGTACAAGGAGGA | GCTTTTGGAGCCTTCTCTACAAT |
| <i>gpsm3</i>       | AGGAGTTTTTCCCAGTCTCAGT  | TTCTCTTCCCACCCAAACAGC   |
| <i>irgm</i>        | CAAAGGCTGGTGGCTTACTTC   | GGGCACTTGGGACACTCTG     |
| <i>map1lc3a</i>    | AACATGAGCGAGTTGGTCAAG   | GCTCGTAGATGTCCGCGAT     |
| <i>atg9a</i>       | ACGAAGATGTGTTGGCTGTG    | ATAAAGGACCTGCACACGGT    |
| <i>map1lc3b</i>    | GATGTCCGACTTATTCGAGAGC  | TTGAGCTGTAAGCGCCTTCTA   |
| <i>bnip3l</i>      | ATGTCGTCCACCTAGTCGAG    | TGAGGATGGTACGTGTTCCAG   |
| <i>actb</i>        | CATGTACGTTGCTATCCAGGC   | CTCCTTAATGTCACGCACGAT   |
|                    |                         |                         |
| <u>Mouse</u>       |                         |                         |
| <i>Hif1b</i>       | GACAGACCACAGGACAGTTCC   | AGCATGGACAGCATTCTTGAA   |
| <i>Pgk1</i>        | ATGTCGCTTTCCAACAAGCTG   | GCTCCATTGTCCAAGCAGAAT   |
| <i>Atg9</i>        | ATGTACCCGAAGGACTCCG     | CATCCGCTGATGATAGCTGT    |
| <i>Ckb</i>         | AGTTCCTGATCTGAGCAGC     | GAATGGCGTCGTCCAAAGTAA   |
| <i>Il6</i>         | GTAGCTATGGTACTCCAGAAGAC | ACGATGATGCACTTGCAGAA    |
| <i>Il1b</i>        | GCCCATCCTCTGTGACTCAT    | AGGCCACAGGTATTTGTGCG    |
| <i>Ccl2</i>        | CTGGATCGGAACCAAATGAG    | AAGGCATCACAGTCCGAGTC    |
| <i>Actb</i>        | GGCTGTATTCCCCTCCATCG    | CCAGTTGGTAACAATGCCATGT  |
